# Supplementary material
Source: Research Square preprint supplement (doi:10.21203/rs.3.rs-9587608/v1)
Supplement: Supplementary file 1 [file c467557eb57c1ac2fc29d706.docx]

Supplementary legends:

**Supplementary Figure 1: Quiescent *Axin2cre* labelled cells form the main body of the new membrane during repair**

(A-B’) *Axin2cre;ERT2;TdTomato* mouse10 days post perforation (dpp) after a 5 month wait between tamoxifen injection and perforation. Red fluorescent protein, RFP (red) and pancytokeratin, PCK (green) showing RFP positive cells in all layers of the healing TM. White boxes in L and M denote zoomed regions for A’,B’. White arrow in A points to RFP positive cell in the OEL, white arrow in A’ points to RFP positive cell in the IML. White arrow in B points to RFP positive cell in the LP. Scale bar in B = 100um. n=1 (2TMs).

IML = inner mucosal layer, OEL = outer epithelial layer, LP =Lamina propria


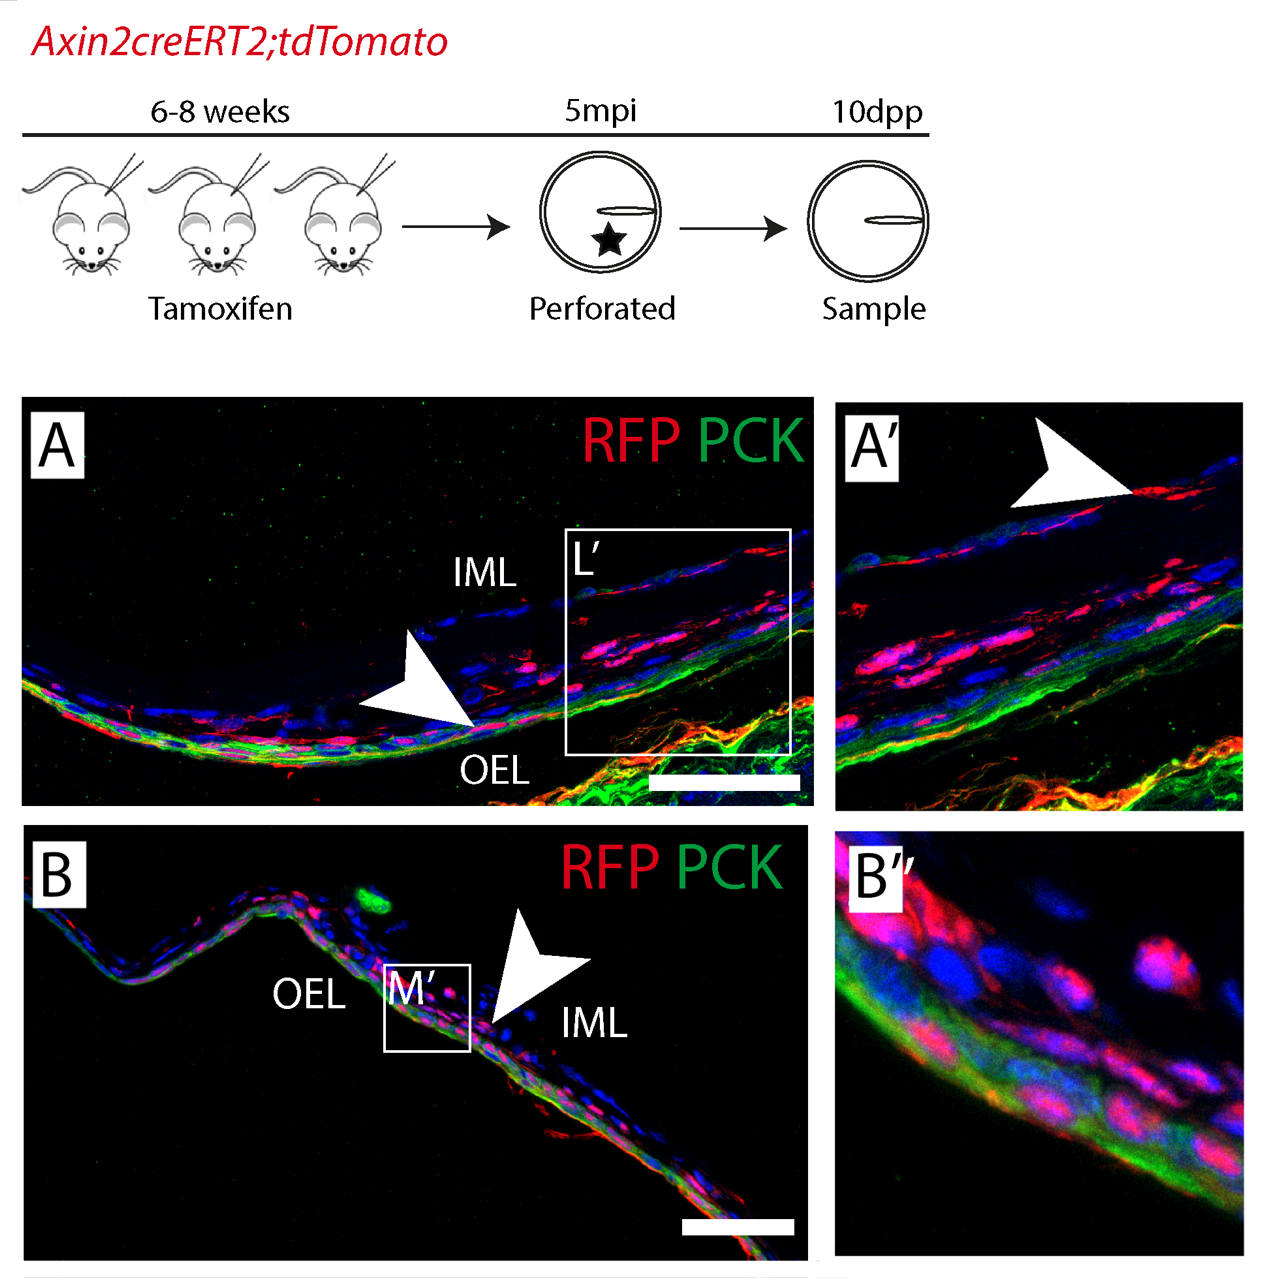


**Supplementary Figure 2:** **Repair defects in LOF mutant mice**

(A-D) Sections of the LOF mouse model at 10dpp (A,B) and 15dpp (C,D). (A) Pancytokeratin (PCK), red-fluorescent protein (RFP) and DAPI show gap where the outer epithelial layer (OEL), has failed to extend. White arrowhead. (B) PCK highlights epithelial invasion into the middle ear cavity (white arrowhead). N= 1 mouse. (C) Break still evident in the TM. White arrowhead denotes site of perforation. (D) Some TMs at 15 dpp were shown to exhibit a bi-layered phenotype. White arrowhead shows area of lack of mesenchyme. N=4 unhealed, N=2 bi-layered. Scale bars =100um.

IML = inner mucosal layer, OEL = outer epithelial layer


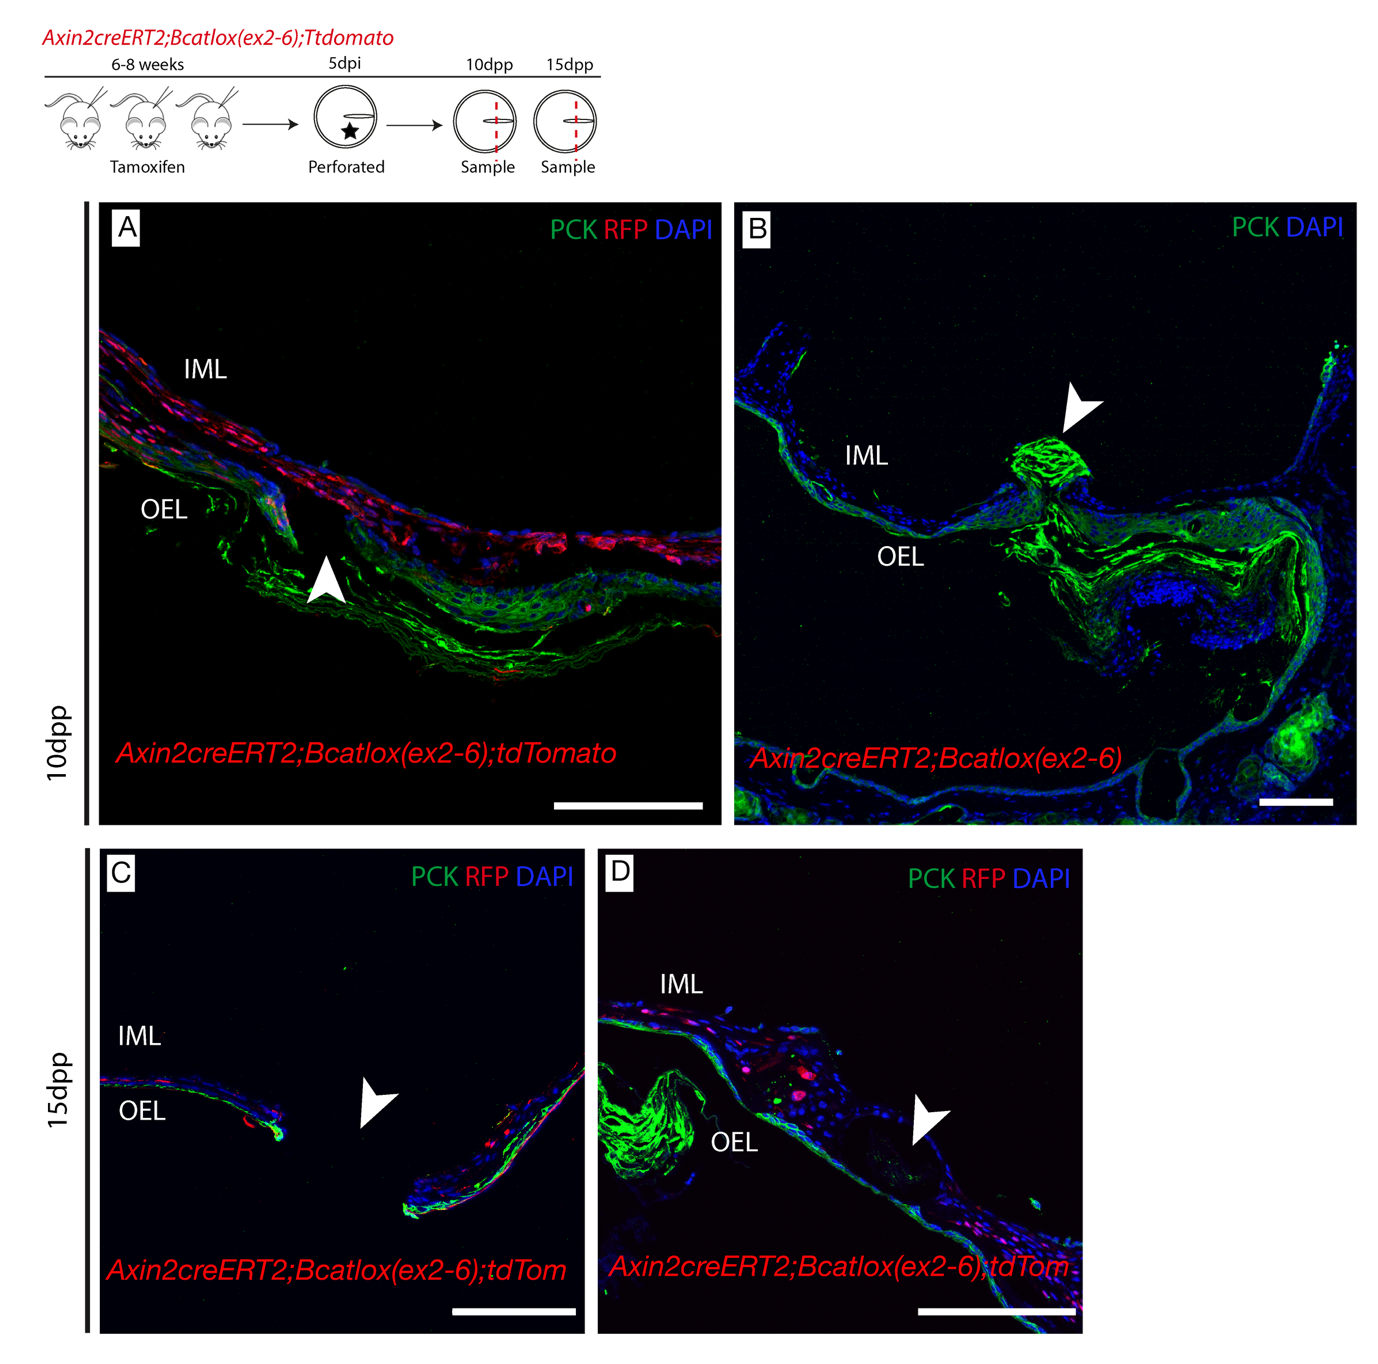


**Supplementary Material:**

Table of Antibodies

| Antibody | Species | Manufacturer | Catalogue Number | Immunofluorescence Dilution |
| --- | --- | --- | --- | --- |
| BrDU | Rat | Abcam | Ab6326 | 1:200 |
| Pan-cytokeratin | Rabbit | Abcam | Ab217916 | 1:200 |
| RFP | Goat | Sicgen | Ab1140-100 | 1:200 |
| LEF-1 | Rabbit | Cell signaling | C12A5 | 1:200 |
| PCNA | Rabbit | Abcam | Ab19166 | 1:200 |
| Non-phospho (active) B-catenin | Rabbit | Cell Signaling | D13A1 | 1:1500 |
| Anti-goat Secondary Antibody, Alexa Fluor 488 | Donkey | Invitrogen | **A-11055** | 1:500 |
| Anti-Rabbit Secondary Antibody, Alexa Fluor 488 | Goat | Invitrogen | **A-11008** | 1:500 |
| Anti-Rabbit Secondary Antibody, Alexa Fluor 568 | Donkey | Invitrogen | **A10042** | 1:500 |
| Anti-rabbit biotinylated secondary | Goat | Thermofisher | **E0432** | 1:500 |
| Hoechst | Na | Thermofisher Scientific | 62249 | 1:1000 |
